# Supplementary material for: Laccase Gene Family in Cerrena sp. HYB07: Sequences, Heterologous Expression and Transcriptional Analysis
Source: PubMed Central journal article supplement (PMC6273318; doi:10.3390/molecules21081017), 2016-08-04
Supplement: molecules-21-01017-s001.pdf [file molecules-21-01017-s001.pdf]

# Supplementary Materials: Laccase Gene Family in *Cerrena* sp. HYB07: Sequences, Heterologous Expression and Transcriptional Analysis

Jie Yang, Xinqi Xu, Tzi Bun Ng, Juan Lin and Xiuyun Ye

**Table S1.** Primers used to clone laccase genes from *Cerrena* sp. HYB07.

| Gene                         | Primer Sequence                                                                                                   | Purpose                                           |
|------------------------------|-------------------------------------------------------------------------------------------------------------------|---------------------------------------------------|
| Laccase<br>L1-L4<br>fragment | L-1F: CAYTGGCAYGGNTTYTTYCA                                                                                        | Degenerate PCR [1]                                |
|                              | L-4R: TGVHARTCDATRTGRCARTG                                                                                        |                                                   |
|                              | R = A/G, Y = C/T, M = A/C, K = G/T, S = G/C, W = A/T, H = A/T/C,<br>D = G/A/T, B = G/T/C, V = G/A/C, N = A/T/G/C. |                                                   |
|                              |                                                                                                                   |                                                   |
| <i>Lac2</i>                  | Lac2-SP1: AATGTAGTTAGGGTCGCAGGAGATAGAGA                                                                           | TAIL-PCR amplification<br>of 5'-flanking sequence |
|                              | Lac2-SP2: GTCGTAGAGGTGCTTGTGTGGATCGTTAGG                                                                          |                                                   |
|                              | Lac2-SP3: AAGAGTTTCCAGTGACAATAGGGCAT                                                                              | TAIL-PCR amplification<br>of 3'-flanking sequence |
|                              | Lac2-SP4: CATCCCTTCCATTTGCACGGTGTAAGTCC                                                                           |                                                   |
|                              | Lac2-SP5: ATCTTACCTCGTTTCTTACTCACCATGCC                                                                           | Amplification of cDNA                             |
|                              | Lac2-SP6: TTCAATGACGCTATCCTCCGA                                                                                   |                                                   |
|                              | Lac2-RT-1: ATGCCCTCTAACTTCCTTTCATTGAC                                                                             |                                                   |
|                              | Lac2-RT-2: TTGGTTTAGATGGCGGTACCCTTC                                                                               |                                                   |
| <i>Lac3</i>                  | Lac3-SP1: CCAGTCAAGCAAGGGTAATAACCGTG                                                                              | TAIL-PCR amplification<br>of 5'-flanking sequence |
|                              | Lac3-SP2: TCGGAGAACCATCGCAATACTGA                                                                                 |                                                   |
|                              | Lac3-SP3: AAGAGTTTCCAGTTGCGATTG                                                                                   | TAIL-PCR amplification<br>of 3'-flanking sequence |
|                              | Lac3-SP4: TTCCTCCTATCGTCCCTGTTCTCCTCCAAA                                                                          |                                                   |
|                              | Lac3-SP5: TCCTCCCATCCGGCAGCGTCTTCTCATT                                                                            | Amplification of cDNA                             |
|                              | Lac3-SP6: GCTCCGACACCTACAACCTACGCCAACC                                                                            |                                                   |
|                              | Lac3-RT-1: GCGGATGTTAACTTTAATTCTTTGCTC                                                                            |                                                   |
|                              | Lac3-RT-2: CTTGTCAGAGTCAGCGAGGGC                                                                                  |                                                   |
|                              | Lac3E-1: GAATTCAGCAATCGGTCCTGTCACTGA ( <i>EcoRI</i> )                                                             | Construction of<br>expression vector              |
|                              | Lac3E-2: <u>CTAGATTACTTGT</u> CAGAGTCAGCGAGGGC ( <i>XbaI</i> )                                                    |                                                   |
| <i>Lac4</i>                  | Lac4-SP1: TCACACCCGAAACCTACCATCATCAACATC                                                                          | TAIL-PCR amplification<br>of 5'-flanking sequence |
|                              | Lac4-SP2: ATCATAGACGACAAAGGCTCCCCGAAG                                                                             |                                                   |
|                              | Lac4-SP3: AGACCATCGCAGTATTGAGTAGACA                                                                               | TAIL-PCR amplification<br>of 3'-flanking sequence |
|                              | Lac4-SP4: GCTTCCTCACACCTCCCACAGTCCCG                                                                              |                                                   |
|                              | Lac4-SP5: TTGGAGCAGAATAAGGTGGTGGAGAT                                                                              | Amplification of cDNA                             |
|                              | Lac4-SP6: ATGAATGCTCCTATTCGTGATGTTGTTA                                                                            |                                                   |
|                              | Lac4-RT-1: TAAACCCACCTGAGAGCGATAACGATGT                                                                           |                                                   |
|                              | Lac4-RT-2: TATTATGTATCTCCTGGGCTCAAG                                                                               |                                                   |
| <i>Lac5</i>                  | Lac5-SP1: CCATTGATAAGAGTCGAGTCCGGTGTCTCTG                                                                         | TAIL-PCR amplification<br>of 5'-flanking sequence |
|                              | Lac5-SP2: GAGGGTCTTCCGGGTCATACACGA                                                                                |                                                   |
|                              | Lac5-SP3: AGTATTGGGTAGACAGGTGGCT                                                                                  | TAIL-PCR amplification<br>of 3'-flanking sequence |
|                              | Lac5-SP4: CATCCTTTCCATCTCCACGGTGTGTCAGTCAT                                                                        |                                                   |
|                              | Lac5-SP5: ATTCTTACAGCAACTTCTGGGTCTGT                                                                              | Amplification of cDNA                             |
|                              | Lac5-SP6: CTATCCGTTTCGTGGTATGACTTCC                                                                               |                                                   |
|                              | Lac5-RT-1: CTCTCCAAGCGATGGTGTCAAA                                                                                 |                                                   |
|                              | Lac5-RT-2: CCGCTTAATTGGTCTGACTGTTGTTG                                                                             |                                                   |

Table S1. Cont.

| Gene         | Primer Sequence                                            | Purpose                                              |                                   |
|--------------|------------------------------------------------------------|------------------------------------------------------|-----------------------------------|
| <i>Lac6</i>  | Lac6-SP1: CCGTTAATCAAGGTAGAGTCAGGTGTA                      | TAIL-PCR amplification of 5'-flanking sequence       |                                   |
|              | Lac6-SP2: AGCAGCACTTACTATCGTCTATGTCGT                      |                                                      |                                   |
|              | Lac6-SP3: CAGTATTGTGTGCGTGAGTGAC                           | TAIL-PCR amplification of 3'-flanking sequence       |                                   |
|              | Lac6-SP4: GACCTCGTTATTCCTCCCCTCAAGAT                       |                                                      |                                   |
|              | Lac6-SP5: TACACCCATTCTGACCGCTATTC                          | Amplification of cDNA                                |                                   |
|              | Lac6-SP6: TTCTGGGTCATTCAAAGTGC                             |                                                      |                                   |
|              | Lac6-RT-1: ATGGTGCCCGCGCTATCCC                             |                                                      |                                   |
|              | Lac6-RT-2: TCGGATTCGCTAAACCAAGACTA                         |                                                      |                                   |
| <i>Lac6E</i> | Lac6E-1: GCAGGAATTCATTACCACAGAGCCGCTTTC ( <i>EcoRI</i> )   | Construction of expression vector                    |                                   |
|              | Lac6E-2: CGGCCCTCTAGACTATGGAACCTAAGTTGTCGT ( <i>XbaI</i> ) |                                                      |                                   |
| <i>Lac7</i>  | Lac7E-1: TTACTCGAGAAAAGAGAGTGAAGCTGCGCC                    | Construction of expression vector                    |                                   |
|              | GTTGGTCCTGTAC ( <i>XhoI</i> )                              |                                                      |                                   |
|              | Lac7E-2: GGGCGGTCTAGATTACTTGTACCATCAGCA ( <i>XbaI</i> )    |                                                      |                                   |
| <i>Lac8</i>  | Lac8-SP1: CGCCTCGTAGACCGTCGCA                              | TAIL-PCR amplification of 5'-flanking sequence       |                                   |
|              | Lac8-SP2: GGGATAGGGCACTGGTTCACGA                           |                                                      |                                   |
|              | Lac8-SP3: AAGAAGCCATGCCAGTGAA                              | TAIL-PCR amplification of 3'-flanking sequence       |                                   |
|              | Lac8-SP4: CGATTTCTGGACATACTCTTGGTTTCT                      |                                                      |                                   |
|              | Lac8-SP5: CTCTATCTAACGCAGCCTCACTAAAG                       | Amplification of cDNA                                |                                   |
|              | Lac8-SP6: ACTGTAGCATAACTTCCACG                             |                                                      |                                   |
|              | Lac8-RT-1: GATGCTTTTTCGCGCTGCA                             |                                                      |                                   |
|              | Lac8-RT-2: TTTGTCGCCTTCGGGCAGA                             |                                                      |                                   |
|              | <i>Lac8E</i>                                               | Lac8E-1: GAATTCAGCCATTGGCCCCGTCGC ( <i>EcoRI</i> )   | Construction of expression vector |
|              |                                                            | Lac8E-2: GCGGCCGCTAGAGATTTTTGTCGCCTT ( <i>NotI</i> ) |                                   |

Arbitrary degenerate primers for TAIL-PCR used were same as previously described [2].

**Table S2.** qPCR primers used in this study.

| <b>Primer</b>      | <b>Sequence</b>          |
|--------------------|--------------------------|
| Lac1-F             | CTTGGTTCCTCCACTGTCATATC  |
| Lac1-R             | GTTATCCAGGACTCAGGAACAG   |
| Lac2-F             | GGCCAAACTGGTTACAATTCA    |
| Lac2-R             | GAACCAAGGTCCAGGGTTATC    |
| Lac3-F             | CACATCGACTGGCATTGGA      |
| Lac3-R             | GTCAGCAGGGATGTTAGTGTTAG  |
| Lac4-F             | CGGGCAAACCACATACTA       |
| Lac4-R             | CCGGGATTATCGGTCACAAATC   |
| Lac5-F             | ACATTGACTGGCACTTGGA      |
| Lac5-R             | CAGTCCTTAGGTGTTGGGTTAG   |
| Lac6-F             | CGTTAGGGACGTGGTGAATATC   |
| Lac6-R             | CGATATGGCAGTGGAGGAAC     |
| Lac7-F             | CTGGTCAAACACTACTCCCACTAC |
| Lac7-R             | GGTGGTGAAACGGATGGTAA     |
| Lac8-F             | CAGGAGAGACCACCTACAATTATG |
| Lac8-R             | GTTGTCAGTAGTGAAGCGGATAG  |
| 18S rRNA-F         | AGACGGAAGTTTGAGGCAATAA   |
| 18S rRNA-R         | CTCCCGCCAAGGTGAATAA      |
| ATP6-F             | CAAGAGCTAATGGAGTACCTGAA  |
| ATP6-R             | CACTATATGGACGGCTGTTACT   |
| Cyt-c-F            | CTGATATGGCCTTCCCTAGATTG  |
| Cyt-c-R            | CATCCTGTACCAGCTCCATTT    |
| EF1-F              | CTACCAACGTGACCACTGAA     |
| EF1-R              | GACGTTCTTGACGTTGAAACC    |
| $\beta$ -tubulin-F | TTAGGTCGCCACTATCTTCCG    |
| $\beta$ -tubulin-R | AACTGGTCGCTGACACGCT      |
| GAPDH-F            | CCGAGTACTTGGAGTCGTATTG   |
| GAPDH-R            | TGCCAAGAAGGTCATCATCTC    |
| RPB2-F             | GTATGGTTTGTCTGCTGAAAC    |
| RPB2-R             | GAGAACGAACCGACGGAAATA    |

**Table S3.** Alignment of the signature sequences (L1-L4) of *Cerrena* sp. HYB07 laccases.

| Protein | L1                                                   | L2                                  | L3       | L4                                  |
|---------|------------------------------------------------------|-------------------------------------|----------|-------------------------------------|
| Lac1    | HWHGFFQKGTNWADGPA <sup>•</sup> SVNQCPV               | GTFWYHSHLSTQYCDGLRGA <sup>•</sup> F | HPFHLHGH | GPWFLHCHIDWHLEIG <sup>•</sup> FAMVF |
| Lac2    | HWHGFFQKGTAWADGPAFV <sup>•</sup> TQCPI               | GTFWYHSHLSTQYCDGLRGA <sup>•</sup> F | HPFHLHGH | GPWFLHCHIDWHLEAGI <sup>•</sup> AVVF |
| Lac3    | HWHGFFQKGTNWADGPA <sup>•</sup> MVNQCPI               | GTFWYHSHLSTQYCDGLRGA <sup>•</sup> F | HPFHLHGH | GPWFLHCHIDWHLEAG <sup>•</sup> FALIF |
| Lac4    | HWHGFFQKGTNWADGPAFV <sup>•</sup> TQCPI               | GTFWYHSHLSTQYCDGLRGA <sup>•</sup> F | HPFHLHGH | GPWFLHCHIDWHLEAG <sup>•</sup> BAVVL |
| Lac5    | HWHGFFQKGTNWADGPAFV <sup>•</sup> TQCPI               | GTFWYHSHLSTQYCDGLRGA <sup>•</sup> F | HPFHLHGH | GPWFLHCHIDWHLEAGI <sup>•</sup> AVVF |
| Lac6    | HWHGFFQKGTNWADGPAFV <sup>•</sup> TQCPI               | GTFWYHSHLSTQYCDGLRGA <sup>•</sup> F | HPFHLHGH | GPWFLHCHIDWHLEAGI <sup>•</sup> AVVF |
| Lac7    | HWHGFFQKGS <sup>•</sup> SWADGADSV <sup>•</sup> TQCPI | GTFWYHSHSR <sup>•</sup> TQYCDGLRGAM | HPFHLHGH | GPWFLHCHIDWHLDAG <sup>•</sup> LAIVF |
| Lac8    | HWHGFFQKGTNWADGPAFV <sup>•</sup> NQCPI               | GTYWYHSHLSTQYCDGLRGA <sup>•</sup> F | HPFHLHGH | GPWFLHCHIDWHLEAG <sup>•</sup> BAVVF |
| Lac8    | HWHGFFQKGTNWADGPA <sup>•</sup> SFVNQCPI              | GTYWYHSHLSTQYCDGLRGA <sup>•</sup> F | HPFHLHGH | GPWFLHCHIDWHLEGG <sup>•</sup> LAVVF |

Amino acids (Ser, Glu and Phe) with proposed roles in determining the redox potential are indicated by dark dots underneath.

**Table S4.** Alignment of the potential substrate-binding loops of *Cerrena* sp. HYB07 laccases.

| Protein | Loop I<br>B1-B2             | B4-B5   | Loop II<br>B7-B8               | Loop III<br>C1-C2                | Loop IV<br>C4-C5          | C7-C8                    |
|---------|-----------------------------|---------|--------------------------------|----------------------------------|---------------------------|--------------------------|
| Lac1    | TLARKLKGPV <sup>•</sup> PD  | ISCDPNY | ANPNAG-MKGF <sup>•</sup> DGGIN | FGFANG-----HFI                   | LAATRKA <sup>•</sup> VGGP | HIDWHLEIG <sup>•</sup> F |
| Lac2    | VLARTVVG <sup>•</sup> VATPD | ISCDPNY | AKPNIG <sup>•</sup> TDTTTNGMN  | LSFAAG-----RFS                   | IPAG--V <sup>•</sup> VGGP | HIDWHLEAG <sup>•</sup> L |
| Lac3    | TLARLGAA <sup>•</sup> FPTPD | LSCDPNF | ANPNLG-TTGF <sup>•</sup> ANGIN | FAFNGSAL-----QFI                 | MPGG--V <sup>•</sup> VGGG | HIDWHLEAG <sup>•</sup> F |
| Lac4    | ALAQT <sup>•</sup> VVGPAVSD | ISCDPNF | AKPNIG-NTTEL <sup>•</sup> GGLN | FGFSNG-----RFI                   | IPAAG-A <sup>•</sup> VGGP | HIDWHLEAG <sup>•</sup> F |
| Lac5    | VLAPT <sup>•</sup> VKFTATPD | IGCFPNY | AVPNLG-DKST <sup>•</sup> DKGIN | LSFSSN-----RFF                   | IPPR--A <sup>•</sup> HDGP | HIDWHLEAG <sup>•</sup> L |
| Lac6    | TLSPN <sup>•</sup> MSGKPTPD | ISCDPNY | AKPNNARD <sup>•</sup> PSFNGGLN | LSFQNV <sup>•</sup> TDPTKEVAGKEM | IPPL--K <sup>•</sup> IGGP | HIDWHLDAG <sup>•</sup> L |
| Lac7    | TLARQ <sup>•</sup> IVGVAIAD | ISCDPNY | ANPNLG-TTGF <sup>•</sup> TGGIN | LGFSAG-----KFI                   | LAAG--V <sup>•</sup> LGGP | HIDWHLEAG <sup>•</sup> F |
| Lac8    | TLAHKN <sup>•</sup> VDPVAD  | TSCEPNY | ANPNVG-TPGF <sup>•</sup> AGGIN | VGLTPNGL-----LYI                 | LAAD--V <sup>•</sup> IAGP | HIDWHLEGG <sup>•</sup> L |

The potential substrate-binding loops were named according to nomenclature of Hakulinen et al. [3] for the two  $\beta$ -strands flanking the respective loop. Open circles underneath indicate the residues corresponding to amino acids in contact with the substrate 2,5-xylydine in LacIIIb of *T. versicolor* [4]. Closed circles underneath indicate the residues corresponding to amino acids in contact with the substrate 2,5-xylydine in Lac7 as proposed by molecular docking (Figure 1B).

**Table S5.** Predicted secondary structures of *Cerrena* sp. HYB07 laccases.

|      | $\alpha$ -Helix (%) | Extend Strand (%) | $\beta$ -Turn (%) | Random Coil (%) |
|------|---------------------|-------------------|-------------------|-----------------|
| Lac1 | 7.74                | 29.01             | 6.19              | 57.06           |
| Lac2 | 11.22               | 30.23             | 5.32              | 53.23           |
| Lac3 | 11.20               | 29.34             | 7.14              | 52.32           |
| Lac4 | 10.66               | 28.68             | 6.59              | 54.07           |
| Lac5 | 12.19               | 29.71             | 7.24              | 50.86           |
| Lac6 | 7.93                | 29.52             | 5.54              | 57.01           |
| Lac7 | 10.66               | 29.46             | 6.20              | 53.68           |
| Lac8 | 11.95               | 29.48             | 6.55              | 52.02           |

**Table S6.** geNorm stability ranking (from most stable to least stable) of *Cerrena* sp. HYB07 housekeeping genes during submerged and solid state fermentation.

| Rank | Submerged Fermentation            | Solid State Fermentation          |
|------|-----------------------------------|-----------------------------------|
| 1    | <i>18S rRNA</i>                   | <i><math>\beta</math>-tubulin</i> |
|      | <i>Cyt-c</i>                      | <i>EF1-<math>\alpha</math></i>    |
| 3    | <i>GAPDH</i>                      | <i>GAPDH</i>                      |
| 4    | <i>EF1-<math>\alpha</math></i>    | <i>18S rRNA</i>                   |
| 5    | <i><math>\beta</math>-tubulin</i> | <i>ATP6</i>                       |
| 6    | <i>ATP6</i>                       | <i>RPB2</i>                       |
| 7    | <i>RPB2</i>                       | <i>Cyt-c</i>                      |

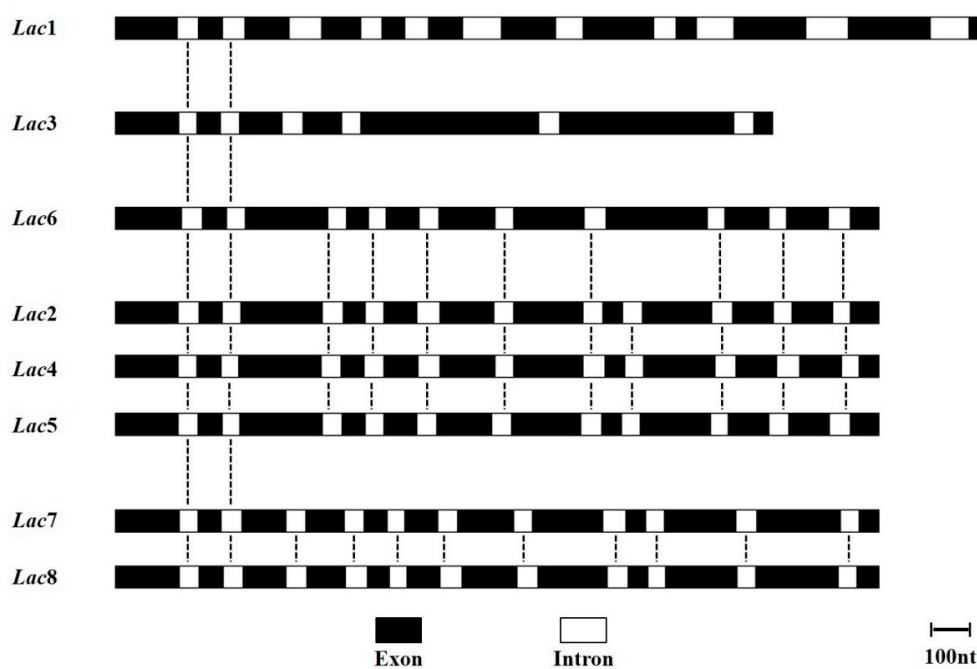**Figure S1.** Genetic organization of *Cerrena* sp. HYB07 laccases genes.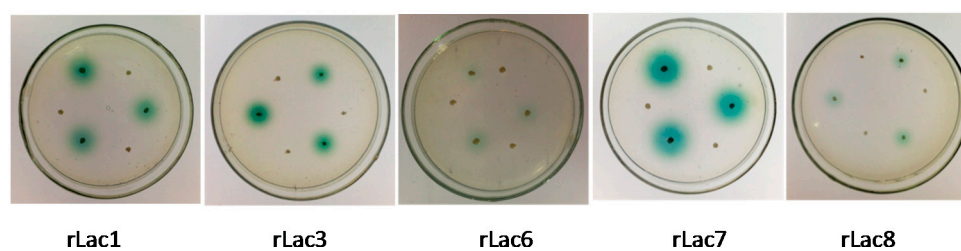**Figure S2.** Positive *Pichia* transformants on MM agar plates supplemented with 0.2 mM ABTS.

Colonies of *Pichia* transformants expressing recombinant laccases turned green while negative controls (transformed with pPICZ $\alpha$  C) did not.

## References

1. D'Souza, T.M.; Boominathan, K.; Reddy, C.A. Isolation of laccase gene-specific sequences from white rot and brown rot fungi by pcr. *Appl. Environ. Microbiol.* **1996**, *62*, 3739–3744.
2. Liu, Z.; Sun, X.; Qu, Y. Cloning cellobiohydrolase I from *penicillium decumbens* 114-2 with tail-pcr and comparing with its derepressed mutant ju-a10. *Acta Microbiol. Sin.* **2008**, *48*, 667–671.
3. Hakulinen, N.; Kiiskinen, L.-L.; Kruus, K.; Saloheimo, M.; Paananen, A.; Koivula, A.; Rouvinen, J. Crystal structure of a laccase from *melanocarpus albomyces* with an intact trinuclear copper site. *Nat. Struct. Biol.* **2002**, *9*, 601–605.
4. Bertrand, T.; Jolival, C.; Briozzo, P.; Caminade, E.; Joly, N.; Madzak, C.; Mougin, C. Crystal structure of a four-copper laccase complexed with an arylamine: Insights into substrate recognition and correlation with kinetics. *Biochemistry* **2002**, *41*, 7325–7333.
